# Supplementary figures and images for: Hemodynamic Characteristics of Mechanically Ventilated COVID-19 Patients: A Cohort Analysis
Source: Hindawi journal article supplement (doi:10.1155/2021/8882753), 2021-01-04

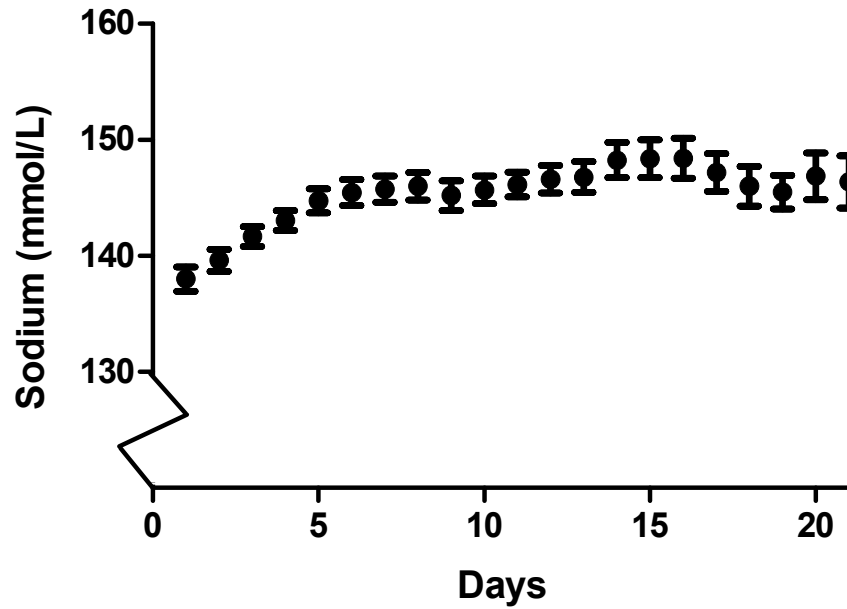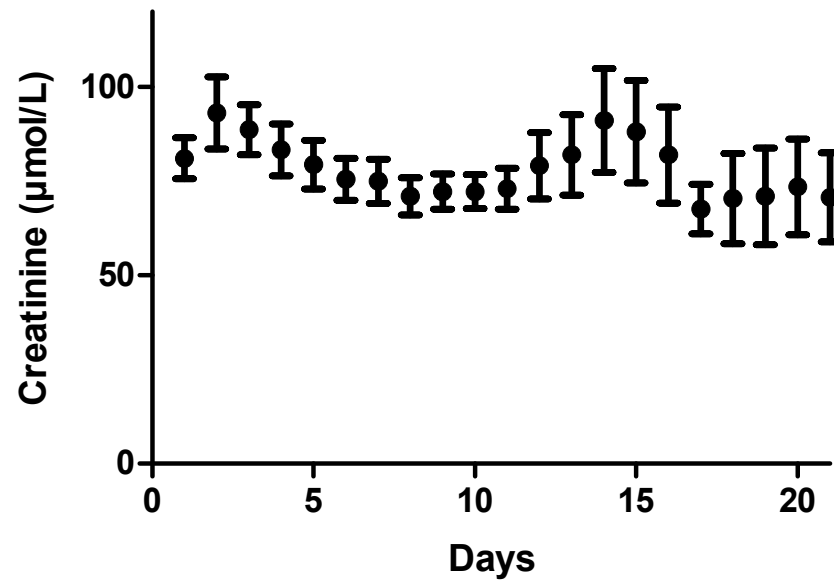

Supplement: f1 [file 8882753.f1.zip]

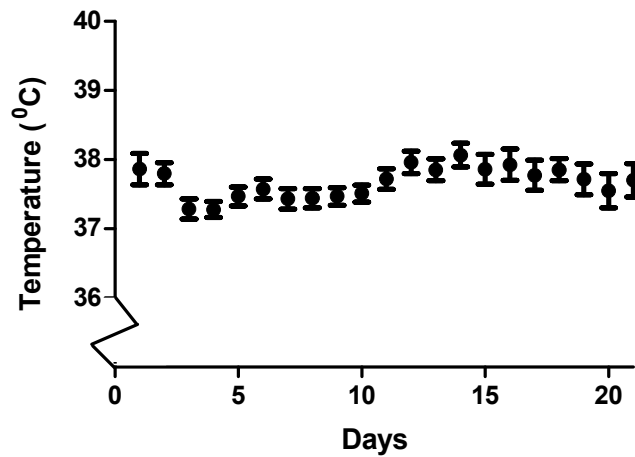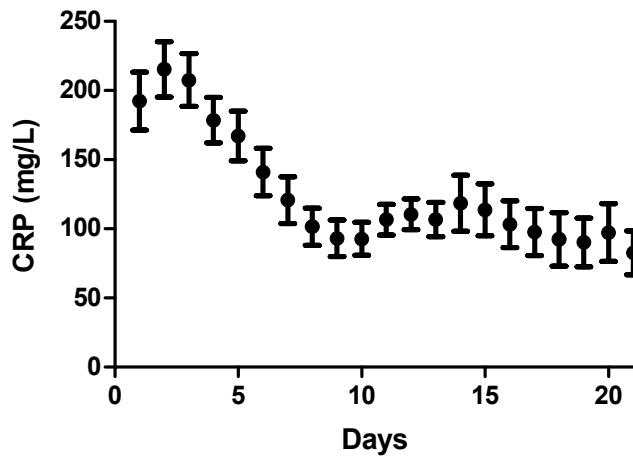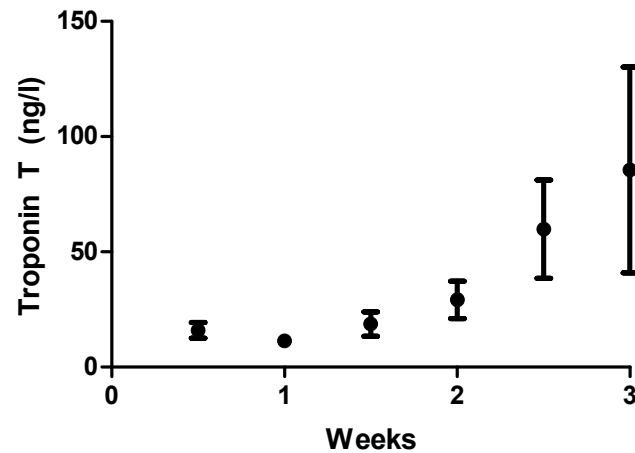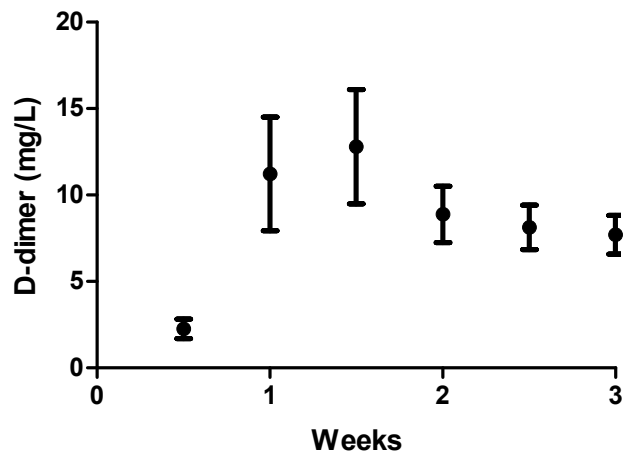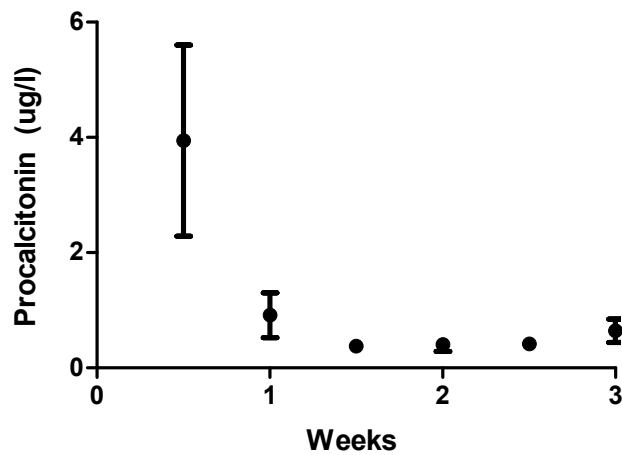

Supplement: f1 [file 8882753.f1.zip]
